# Supplementary material for: Supports Used by Aboriginal and Torres Strait Islander Women for Their Health, including Smoking Cessation, and a Baby’s Health: A Cross-Sectional Survey in New South Wales, Australia
Source: MDPI journal article supplement (doi:10.3390/ijerph17217766), 2020-10-23
Supplement: s1 [file s1]

## **Supplementary File 1: Survey Questions**

### **Section 1: First some questions about yourself and your household**

**1. What is your age \_\_\_\_\_**

**2. Do you identify as Aboriginal or Torres Strait Islander?**

- ☐ Yes, Aboriginal
- ☐ Yes, Torres Strait Islander
- ☐ Yes, Aboriginal & Torres Strait Islander
- ☐ Not, Aboriginal & Torres Strait Islander [exclude from study]

**3. Are you currently pregnant?**

- ☐ Yes
- ☐ No

**A. If yes: how far into your pregnancy are you?**

- ☐ Up to 12 weeks
- ☐ 13-24 weeks
- ☐ 25 weeks to 40 weeks (to term)

**B. If no: have you given birth before?**

- ☐ Yes
- ☐ No

**4. Is a baby or child living in your household?**

- ☐ Yes
- ☐ No

**A. If yes, how many babies and/or children are living in your household?**

- ☐ 1 child
- ☐ 2 children
- ☐ 3 children
- ☐ 4 or more children

**B. How old are the children (tick any boxes that apply)**

- ☐ 0 to 12 months
- ☐ 1 to 2 years
- ☐ 3 years and older

**Section 2: These questions are about tobacco smoking**

5. **How many tobacco smokers (include yourself if you still smoke) usually live in your household?**
- ☐ 0
  - ☐ 1
  - ☐ 2-3
  - ☐ More than 3
6. **How does your household manage places where smoking is allowed?**
- ☐ Complete ban on smoking anywhere inside the house or outside
  - ☐ Smoking only on verandah/immediate area outside (not inside)
  - ☐ Smoking allowed in some rooms and on verandah/immediate area outside
  - ☐ People can smoke anywhere in or outside
7. **Do you currently smoke tobacco?**
- ☐ Yes
  - ☐ No I used to smoke tobacco but have quit completely (Skip to section 3)
  - ☐ No I have never smoked tobacco of any type (Skip to section 3)

**For those who are currently smoking only:**

8. **How often do you smoke tobacco?**
- ☐ Every day
  - ☐ Most days (4 or more days a week, but not every day)
  - ☐ Some days (1-3 days a week)
  - ☐ Very occasionally (less than once a week)
9. **How many cigarettes do you smoke per day when you do smoke?**
- ☐ 10 or less
  - ☐ 11-20
  - ☐ 21-30
  - ☐ 31 or more
10. **How soon do you have your first smoke after waking in the morning when you do smoke?**
- ☐ Within 5 minutes
  - ☐ 6-30 minutes
  - ☐ 31-60 minutes
  - ☐ Over 60 minutes
11. **Have you ever tried to quit smoking?**
- ☐ Yes I am trying to quit now
  - ☐ Yes, in the last 3 months
  - ☐ Yes, between 6 – 12 months ago
  - ☐ Yes, over one year ago
  - ☐ No, I have never tried to quit smoking

**12. What have you used to quit smoking?**

- ☐ Nicotine patches
- ☐ Nicotine gum
- ☐ I quit cold turkey
- ☐ Other, \_\_\_\_\_
- ☐ I haven't tried to quit smoking

**Section 3: these questions are about community supports you use for your health**

*Please answer each question by choosing which response applies to you depending on how likely you are take the following actions*

| 13. How likely is it that you (or a family/friend) would use the following supports to help quit smoking: | <i>Very unlikely</i> | <i>Unlikely</i> | <i>Neither likely or unlikely</i> | <i>Likely</i> | <i>Very likely</i> |
|-----------------------------------------------------------------------------------------------------------|----------------------|-----------------|-----------------------------------|---------------|--------------------|
| a. Talk to friends                                                                                        | 1                    | 2               | 3                                 | 4             | 5                  |
| b. Talk to a Doctor, Aboriginal Medical Service or other health professional                              | 1                    | 2               | 3                                 | 4             | 5                  |
| c. Use quit medications (i.e. Nicotine patches/gum etc.)                                                  | 1                    | 2               | 3                                 | 4             | 5                  |
| d. Get support on Facebook i.e. follow a page or post about your quitting                                 | 1                    | 2               | 3                                 | 4             | 5                  |
| e. Talk to elders or Aunties or other family                                                              | 1                    | 2               | 3                                 | 4             | 5                  |
| f. Search the internet e.g. 'Google' for advice and information                                           | 1                    | 2               | 3                                 | 4             | 5                  |
| g Use a phone App e.g. 'My QuitBuddy'                                                                     | 1                    | 2               | 3                                 | 4             | 5                  |
| h. Attend a community group e.g. health group                                                             | 1                    | 2               | 3                                 | 4             | 5                  |
| i, Telephone support                                                                                      | 1                    | 2               | 3                                 | 4             | 5                  |
| j. other _____                                                                                            | 1                    | 2               | 3                                 | 4             | 5                  |

***Please answer each question by choosing which response applies to you depending on how likely you are take the following actions***

| <b>14. How likely is it that in the next 3 months you will use the following supports for your health (e.g. healthy eating, exercise, mental health and wellbeing):</b> | <b><i>Very unlikely</i></b> | <b><i>Unlikely</i></b> | <b><i>Neither likely or unlikely</i></b> | <b><i>Likely</i></b> | <b><i>Very likely</i></b> |
|-------------------------------------------------------------------------------------------------------------------------------------------------------------------------|-----------------------------|------------------------|------------------------------------------|----------------------|---------------------------|
| <b>a. Talk to friends</b>                                                                                                                                               | <b>1</b>                    | <b>2</b>               | <b>3</b>                                 | <b>4</b>             | <b>5</b>                  |
| <b>b. Talk to a Doctor, Aboriginal Medical Service or other health professional</b>                                                                                     | <b>1</b>                    | <b>2</b>               | <b>3</b>                                 | <b>4</b>             | <b>5</b>                  |
| <b>c. Read information on Facebook</b>                                                                                                                                  | <b>1</b>                    | <b>2</b>               | <b>3</b>                                 | <b>4</b>             | <b>5</b>                  |
| <b>d. Talk to elders or Aunties or other family</b>                                                                                                                     | <b>1</b>                    | <b>2</b>               | <b>3</b>                                 | <b>4</b>             | <b>5</b>                  |
| <b>e. Search the internet e.g. 'Google'</b>                                                                                                                             | <b>1</b>                    | <b>2</b>               | <b>3</b>                                 | <b>4</b>             | <b>5</b>                  |
| <b>f. Use a phone App e.g. 'My QuitBuddy', 'Deadly Tots' , 'Couch to 5km',</b>                                                                                          | <b>1</b>                    | <b>2</b>               | <b>3</b>                                 | <b>4</b>             | <b>5</b>                  |
| <b>g. Attend a community group e.g. sporting, healthy eating, art group</b>                                                                                             | <b>1</b>                    | <b>2</b>               | <b>3</b>                                 | <b>4</b>             | <b>5</b>                  |
| <b>h. Use telephone support</b>                                                                                                                                         | <b>1</b>                    | <b>2</b>               | <b>3</b>                                 | <b>4</b>             | <b>5</b>                  |
| <b>i. Other _____</b>                                                                                                                                                   | <b>1</b>                    | <b>2</b>               | <b>3</b>                                 | <b>4</b>             | <b>5</b>                  |

*Please answer each question by choosing which response applies to you depending on how likely you are take the following actions*

| <b>15. How likely is it that you (or a family/friend) would use the following supports for the health of a baby or small child (e.g. your own baby, niece/nephew, grandbaby):</b> | <b><i>Very unlikely</i></b> | <b><i>Unlikely</i></b> | <b><i>Neither likely or unlikely</i></b> | <b><i>Likely</i></b> | <b><i>Very likely</i></b> |
|-----------------------------------------------------------------------------------------------------------------------------------------------------------------------------------|-----------------------------|------------------------|------------------------------------------|----------------------|---------------------------|
| <b>a. Talk to friends</b>                                                                                                                                                         | <b>1</b>                    | <b>2</b>               | <b>3</b>                                 | <b>4</b>             | <b>5</b>                  |
| <b>b. Talk to a Doctor, Aboriginal Medical Service or other health professional</b>                                                                                               | <b>1</b>                    | <b>2</b>               | <b>3</b>                                 | <b>4</b>             | <b>5</b>                  |
| <b>c. Use Facebook or other social media site for support or advise</b>                                                                                                           | <b>1</b>                    | <b>2</b>               | <b>3</b>                                 | <b>4</b>             | <b>5</b>                  |
| <b>d. Talk to elders or Aunties or other family</b>                                                                                                                               | <b>1</b>                    | <b>2</b>               | <b>3</b>                                 | <b>4</b>             | <b>5</b>                  |
| <b>e. Search the internet e.g. 'Google'</b>                                                                                                                                       | <b>1</b>                    | <b>2</b>               | <b>3</b>                                 | <b>4</b>             | <b>5</b>                  |
| <b>f. Use a phone App e.g. 'Deadly Tots'</b>                                                                                                                                      | <b>1</b>                    | <b>2</b>               | <b>3</b>                                 | <b>4</b>             | <b>5</b>                  |
| <b>g. Attend a community group e.g. playgroup</b>                                                                                                                                 | <b>1</b>                    | <b>2</b>               | <b>3</b>                                 | <b>4</b>             | <b>5</b>                  |
| <b>h. Telephone support</b>                                                                                                                                                       | <b>1</b>                    | <b>2</b>               | <b>3</b>                                 | <b>4</b>             | <b>5</b>                  |
| <b>h. other _____</b>                                                                                                                                                             | <b>1</b>                    | <b>2</b>               | <b>3</b>                                 | <b>4</b>             | <b>5</b>                  |

**Supplementary Table 1: *Characteristics of participants that talk to a health professional***

| <b>Question</b>                                                       | <b>Option</b>                            | <b>To Quit Smoking<br/>(n=81)</b> | <b>Your Health<br/>(n=91)</b> | <b>For a Baby<br/>(n=96)</b> |
|-----------------------------------------------------------------------|------------------------------------------|-----------------------------------|-------------------------------|------------------------------|
| What is your age?                                                     | n                                        | 80                                | 89                            | 94                           |
|                                                                       | mean (SD)                                | 39.23 (14.18)                     | 40.8 (14.43)                  | 39.16 (14.32)                |
|                                                                       | median (min, max)                        | 38.5 (0, 67)                      | 39 (0, 79)                    | 37.5 (0, 68)                 |
| Dichotomised Age                                                      | 16-49 years                              | 55 (70%)                          | 60 (68%)                      | 66 (71%)                     |
|                                                                       | 50+ years                                | 24 (30%)                          | 28 (32%)                      | 27 (29%)                     |
|                                                                       | Missing                                  | 2                                 | 3                             | 3                            |
| Do you identify as Aboriginal or Torres Strait Islander?              | Yes, Aboriginal                          | 77 (96%)                          | 85 (94%)                      | 91 (96%)                     |
|                                                                       | Yes, Aboriginal & Torres Strait Islander | 3 (3.8%)                          | 5 (5.6%)                      | 4 (4.2%)                     |
|                                                                       | Missing                                  | 1                                 | 1                             | 1                            |
| Are you currently pregnant?                                           | No                                       | 75 (93%)                          | 82 (92%)                      | 88 (94%)                     |
|                                                                       | Yes                                      | 6 (7.4%)                          | 7 (7.9%)                      | 6 (6.4%)                     |
|                                                                       | Missing                                  | 0                                 | 2                             | 2                            |
| How far into your pregnancy are you?(if pregnant)                     | up to 12 weeks                           |                                   |                               |                              |
|                                                                       | 13 to 24 weeks                           | 2 (33%)                           | 2 (29%)                       | 1 (17%)                      |
|                                                                       | 25 to 40 weeks                           | 4 (67%)                           | 5 (71%)                       | 5 (83%)                      |
|                                                                       | Missing                                  | 75                                | 84                            | 90                           |
| Have you given birth before?(if not pregnant)                         | No                                       | 10 (19%)                          | 11 (19%)                      | 11 (17%)                     |
|                                                                       | Yes                                      | 44 (81%)                          | 47 (81%)                      | 52 (83%)                     |
|                                                                       | Missing                                  | 27                                | 33                            | 33                           |
| If yes, how many babies and/or children are living in your household? | No Children                              | 31 (39%)                          | 33 (38%)                      | 33 (35%)                     |
|                                                                       | 1 child                                  | 5 (6.3%)                          | 7 (8.1%)                      | 12 (13%)                     |
|                                                                       | 2 children                               | 17 (22%)                          | 13 (15%)                      | 14 (15%)                     |
|                                                                       | 3 children                               | 14 (18%)                          | 16 (19%)                      | 17 (18%)                     |
|                                                                       | 4 or more children                       | 12 (15%)                          | 17 (20%)                      | 17 (18%)                     |
|                                                                       | Missing                                  | 2                                 | 5                             | 3                            |
| Number of tobacco smokers in household?                               | 0                                        | 31 (39%)                          | 39 (43%)                      | 35 (36%)                     |
|                                                                       | 1                                        | 23 (29%)                          | 25 (28%)                      | 31 (32%)                     |
|                                                                       | 2-3                                      | 24 (30%)                          | 24 (27%)                      | 27 (28%)                     |
|                                                                       | More than 3                              | 2 (2.5%)                          | 2 (2.2%)                      | 3 (3.1%)                     |
|                                                                       | Missing                                  | 1                                 | 1                             | 0                            |
| How does your household manage places where smoking is allowed?       | Complete ban on smoking anywhere inside  | 13 (16%)                          | 19 (22%)                      | 17 (18%)                     |

|                                                                                |                                             |             |             |              |
|--------------------------------------------------------------------------------|---------------------------------------------|-------------|-------------|--------------|
|                                                                                | Smoking only on verandah/immediate area     | 58 (73%)    | 59 (68%)    | 66 (72%)     |
|                                                                                | Smoking allowed in some rooms & on veranda  | 6 (7.5%)    | 6 (6.9%)    | 7 (7.6%)     |
|                                                                                | People can smoke anywhere in or outside     | 3 (3.8%)    | 3 (3.4%)    | 2 (2.2%)     |
|                                                                                | Missing                                     | 1           | 4           | 4            |
| Do you currently smoke tobacco?                                                | Yes                                         | 35 (44%)    | 33 (37%)    | 39 (41%)     |
|                                                                                | No, I used to smoke tobacco but have quit   | 24 (30%)    | 29 (33%)    | 31 (33%)     |
|                                                                                | No, I have never smoked tobacco of any time | 20 (25%)    | 27 (30%)    | 25 (26%)     |
|                                                                                | Missing                                     | 2           | 2           | 1            |
| How often do you smoke tobacco?(smokers only)                                  | Daily                                       | 26 (74%)    | 24 (77%)    | 27 (73%)     |
|                                                                                | Non-Daily                                   | 9 (26%)     | 7 (23%)     | 10 (27%)     |
|                                                                                | Missing                                     | 46          | 60          | 59           |
| How many cigarettes do you smoke per day? (continuous variable- smokers only)  | n                                           | 14          | 10          | 9            |
|                                                                                | mean (SD)                                   | 9.64 (5.02) | 10.6 (4.86) | 10.56 (5.29) |
|                                                                                | median (min, max)                           | 10 (4, 20)  | 10 (5, 20)  | 10 (4, 20)   |
| How many cigarettes do you smoke per day? (categorical variable- smokers only) | 10 or less                                  | 23 (66%)    | 22 (69%)    | 22 (58%)     |
|                                                                                | 11-20                                       | 12 (34%)    | 10 (31%)    | 16 (42%)     |
|                                                                                | Missing                                     | 46          | 59          | 58           |
| How soon do you have your first smoke?                                         | don't smoke at all                          | 1 (2.9%)    |             |              |
|                                                                                | Within 5 minutes                            | 5 (15%)     | 5 (17%)     | 5 (14%)      |
|                                                                                | 6-30 minutes                                | 18 (53%)    | 15 (50%)    | 18 (50%)     |
|                                                                                | 31-60 minutes                               | 5 (15%)     | 6 (20%)     | 6 (17%)      |
|                                                                                | Over 60 minutes                             | 5 (15%)     | 4 (13%)     | 7 (19%)      |
|                                                                                | Missing                                     | 47          | 61          | 60           |
| Heaviness of Smoking Index                                                     | n                                           | 34          | 30          | 36           |
|                                                                                | mean (SD)                                   | 5.12 (1.25) | 5.03 (1.22) | 5.03 (1.28)  |
|                                                                                | median (min, max)                           | 5 (3, 7)    | 5 (3, 7)    | 5 (3, 7)     |
| Have you ever tried to quit smoking? (Yes/No. Smokers only)                    | No, I haven't tried to quit                 | 5 (14%)     | 5 (16%)     | 4 (11%)      |
|                                                                                | Yes, I've tried to quit                     | 30 (86%)    | 27 (84%)    | 34 (89%)     |
|                                                                                | Missing                                     | 46          | 59          | 58           |



**Supplementary Table 2: Characteristics of participants that use a telephone**

| Question                                                              | Option                                   | To Quit Smoking<br>(n=34) | Your Health<br>(n=39) | For a Baby<br>(n=44) |
|-----------------------------------------------------------------------|------------------------------------------|---------------------------|-----------------------|----------------------|
| What is your age?                                                     | n                                        | 34                        | 38                    | 43                   |
|                                                                       | mean (SD)                                | 39.88 (13.54)             | 38.16 (12.35)         | 37.98 (13.71)        |
|                                                                       | median (min, max)                        | 40.5 (16, 67)             | 37 (16, 63)           | 37 (0, 64)           |
| Dichotomised Age                                                      | 16-49 years                              | 24 (71%)                  | 29 (76%)              | 31 (74%)             |
|                                                                       | 50+ years                                | 10 (29%)                  | 9 (24%)               | 11 (26%)             |
|                                                                       | Missing                                  | 0                         | 1                     | 2                    |
| Do you identify as Aboriginal or Torres Strait Islander?              | Yes, Aboriginal                          | 32 (94%)                  | 37 (95%)              | 40 (93%)             |
|                                                                       | Yes, Aboriginal & Torres Strait Islander | 2 (5.9%)                  | 2 (5.1%)              | 3 (7.0%)             |
|                                                                       | Missing                                  | 0                         | 0                     | 1                    |
| Are you currently pregnant?                                           | No                                       | 34 (100%)                 | 35 (90%)              | 41 (93%)             |
|                                                                       | Yes                                      |                           | 4 (10%)               | 3 (6.8%)             |
|                                                                       | Missing                                  | 0                         | 0                     | 0                    |
| How far into your pregnancy are you?(if pregnant)                     | up to 12 weeks                           |                           |                       |                      |
|                                                                       | 13 to 24 weeks                           |                           | 1 (25%)               |                      |
|                                                                       | 25 to 40 weeks                           |                           | 3 (75%)               | 3 (100%)             |
|                                                                       | Missing                                  | 34                        | 35                    | 41                   |
| Have you given birth before?(if not pregnant)                         | No                                       | 5 (18%)                   | 5 (19%)               | 4 (14%)              |
|                                                                       | Yes                                      | 23 (82%)                  | 22 (81%)              | 25 (86%)             |
|                                                                       | Missing                                  | 6                         | 12                    | 15                   |
| If yes, how many babies and/or children are living in your household? | No Children                              | 11 (32%)                  | 14 (36%)              | 14 (32%)             |
|                                                                       | 1 child                                  | 2 (5.9%)                  | 2 (5.1%)              | 5 (11%)              |
|                                                                       | 2 children                               | 10 (29%)                  | 8 (21%)               | 8 (18%)              |
|                                                                       | 3 children                               | 6 (18%)                   | 6 (15%)               | 6 (14%)              |
|                                                                       | 4 or more children                       | 5 (15%)                   | 9 (23%)               | 11 (25%)             |
|                                                                       | Missing                                  | 0                         | 0                     | 0                    |
| Number of tobacco Smokers in household?                               | 0                                        | 15 (44%)                  | 18 (46%)              | 18 (41%)             |
|                                                                       | 1                                        | 12 (35%)                  | 9 (23%)               | 12 (27%)             |
|                                                                       | 2-3                                      | 7 (21%)                   | 11 (28%)              | 13 (30%)             |
|                                                                       | More than 3                              |                           | 1 (2.6%)              | 1 (2.3%)             |
|                                                                       | Missing                                  | 0                         | 0                     | 0                    |
| How does your household manage places where smoking is allowed?       | Complete ban on smoking anywhere inside  | 7 (21%)                   | 11 (28%)              | 11 (25%)             |

|                                                                               |                                             |              |             |             |
|-------------------------------------------------------------------------------|---------------------------------------------|--------------|-------------|-------------|
|                                                                               | Smoking only on verandah/immediate area     | 24 (71%)     | 24 (62%)    | 30 (68%)    |
|                                                                               | Smoking allowed in some rooms & on veranda  | 1 (2.9%)     | 2 (5.1%)    | 3 (6.8%)    |
|                                                                               | People can smoke anywhere in or outside     | 2 (5.9%)     | 2 (5.1%)    |             |
|                                                                               | Missing                                     | 0            | 0           | 0           |
| Do you currently smoke tobacco?                                               | Yes                                         | 13 (39%)     | 13 (34%)    | 16 (36%)    |
|                                                                               | No, I used to smoke tobacco but have quit   | 8 (24%)      | 12 (32%)    | 14 (32%)    |
|                                                                               | No, I have never smoked tobacco of any time | 12 (36%)     | 13 (34%)    | 14 (32%)    |
|                                                                               | Missing                                     | 1            | 1           | 0           |
| How often do you smoke tobacco?(smokers only)                                 | Daily                                       | 12 (92%)     | 11 (85%)    | 13 (81%)    |
|                                                                               | Non-Daily                                   | 1 (7.7%)     | 2 (15%)     | 3 (19%)     |
|                                                                               | Missing                                     | 21           | 26          | 28          |
| How many cigarettes do you smoke per day? (continuous variable-smokers only)  | n                                           | 6            | 4           | 5           |
|                                                                               | mean (SD)                                   | 11.67 (4.08) | 12.5 (5)    | 11.2 (5.22) |
|                                                                               | median (min, max)                           | 10 (10, 20)  | 10 (10, 20) | 10 (6, 20)  |
| How many cigarettes do you smoke per day? (categorical variable-smokers only) | 10 or less                                  | 8 (62%)      | 8 (62%)     | 10 (63%)    |
|                                                                               | 11-20                                       | 5 (38%)      | 5 (38%)     | 6 (38%)     |
|                                                                               | Missing                                     | 21           | 26          | 28          |
| How soon do you have your first smoke?                                        | don't smoke at all                          |              |             |             |
|                                                                               | Within 5 minutes                            | 3 (25%)      | 3 (25%)     | 2 (13%)     |
|                                                                               | 6-30 minutes                                | 6 (50%)      | 4 (33%)     | 6 (40%)     |
|                                                                               | 31-60 minutes                               | 3 (25%)      | 4 (33%)     | 4 (27%)     |
|                                                                               | Over 60 minutes                             |              | 1 (8.3%)    | 3 (20%)     |
|                                                                               | Missing                                     | 22           | 27          | 29          |
| Heaviness of Smoking Index                                                    | n                                           | 12           | 12          | 15          |
|                                                                               | mean (SD)                                   | 5.42 (1)     | 5.17 (1.34) | 4.87 (1.25) |
|                                                                               | median (min, max)                           | 5 (4, 7)     | 5 (3, 7)    | 5 (3, 7)    |
| Have you ever tried to quit smoking?(Yes/No. Smokers only)                    | No, I haven't tried to quit                 | 1 (7.7%)     | 1 (7.7%)    | 2 (13%)     |
|                                                                               | Yes, I've tried to quit                     | 12 (92%)     | 12 (92%)    | 14 (88%)    |
|                                                                               | Missing                                     | 21           | 26          | 28          |

**Supplementary Table 3: *Characteristics of participants that talk to family***

| Question                                                              | Option                                   | To Quit Smoking<br>(n=64) | Your Health<br>(n=76) | For a Baby<br>(n=86) |
|-----------------------------------------------------------------------|------------------------------------------|---------------------------|-----------------------|----------------------|
| What is your age?                                                     | n                                        | 63                        | 74                    | 84                   |
|                                                                       | mean (SD)                                | 38.4 (14.53)              | 39.61 (14.57)         | 39.14 (14.76)        |
|                                                                       | median (min, max)                        | 38 (0, 68)                | 37.5 (0, 79)          | 37 (0, 79)           |
| Dichotomised Age                                                      | 16-49 years                              | 44 (71%)                  | 52 (71%)              | 59 (71%)             |
|                                                                       | 50+ years                                | 18 (29%)                  | 21 (29%)              | 24 (29%)             |
|                                                                       | Missing                                  | 2                         | 3                     | 3                    |
| Do you identify as Aboriginal or Torres Strait Islander?              | Yes, Aboriginal                          | 60 (95%)                  | 71 (95%)              | 81 (95%)             |
|                                                                       | Yes, Aboriginal & Torres Strait Islander | 3 (4.8%)                  | 4 (5.3%)              | 4 (4.7%)             |
|                                                                       | Missing                                  | 1                         | 1                     | 1                    |
| Are you currently pregnant?                                           | No                                       | 60 (94%)                  | 69 (93%)              | 78 (93%)             |
|                                                                       | Yes                                      | 4 (6.3%)                  | 5 (6.8%)              | 6 (7.1%)             |
|                                                                       | Missing                                  | 0                         | 2                     | 2                    |
| How far into your pregnancy are you? (if pregnant)                    | up to 12 weeks                           |                           |                       |                      |
|                                                                       | 13 to 24 weeks                           | 1 (25%)                   | 1 (20%)               | 1 (17%)              |
|                                                                       | 25 to 40 weeks                           | 3 (75%)                   | 4 (80%)               | 5 (83%)              |
|                                                                       | Missing                                  | 60                        | 71                    | 80                   |
| Have you given birth before? (if not pregnant)                        | No                                       | 6 (15%)                   | 8 (16%)               | 10 (18%)             |
|                                                                       | Yes                                      | 33 (85%)                  | 41 (84%)              | 45 (82%)             |
|                                                                       | Missing                                  | 25                        | 27                    | 31                   |
| If yes, how many babies and/or children are living in your household? | No Children                              | 24 (39%)                  | 26 (37%)              | 28 (34%)             |
|                                                                       | 1 child                                  | 5 (8.1%)                  | 5 (7.0%)              | 10 (12%)             |
|                                                                       | 2 children                               | 14 (23%)                  | 13 (18%)              | 14 (17%)             |
|                                                                       | 3 children                               | 9 (15%)                   | 12 (17%)              | 14 (17%)             |
|                                                                       | 4 or more children                       | 10 (16%)                  | 15 (21%)              | 17 (20%)             |
|                                                                       | Missing                                  | 2                         | 5                     | 3                    |
| Number of tobacco Smokers in household?                               | 0                                        | 28 (44%)                  | 36 (48%)              | 33 (38%)             |
|                                                                       | 1                                        | 19 (30%)                  | 21 (28%)              | 26 (30%)             |
|                                                                       | 2-3                                      | 15 (23%)                  | 15 (20%)              | 24 (28%)             |
|                                                                       | More than 3                              | 2 (3.1%)                  | 3 (4.0%)              | 3 (3.5%)             |
|                                                                       | Missing                                  | 0                         | 1                     | 0                    |
| How does your household manage places where smoking is allowed?       | Complete ban on smoking anywhere inside  | 12 (20%)                  | 16 (22%)              | 17 (21%)             |
|                                                                       | Smoking only on verandah/immediate area  | 44 (72%)                  | 49 (68%)              | 56 (68%)             |

|                                                                               |                                             |             |             |            |
|-------------------------------------------------------------------------------|---------------------------------------------|-------------|-------------|------------|
|                                                                               | Smoking allowed in some rooms & on veranda  | 4 (6.6%)    | 5 (6.9%)    | 6 (7.3%)   |
|                                                                               | People can smoke anywhere in or outside     | 1 (1.6%)    | 2 (2.8%)    | 3 (3.7%)   |
|                                                                               | Missing                                     | 3           | 4           | 4          |
| Do you currently smoke tobacco?                                               | Yes                                         | 22 (35%)    | 24 (32%)    | 33 (39%)   |
|                                                                               | No, I used to smoke tobacco but have quit   | 21 (33%)    | 26 (35%)    | 29 (34%)   |
|                                                                               | No, I have never smoked tobacco of any time | 20 (32%)    | 24 (32%)    | 23 (27%)   |
|                                                                               | Missing                                     | 1           | 2           | 1          |
| How often do you smoke tobacco?(smokers only)                                 | Daily                                       | 15 (71%)    | 16 (70%)    | 22 (69%)   |
|                                                                               | Non-Daily                                   | 6 (29%)     | 7 (30%)     | 10 (31%)   |
|                                                                               | Missing                                     | 43          | 53          | 54         |
| How many cigarettes do you smoke per day? (continuous variable-smokers only)  | n                                           | 8           | 7           | 9          |
|                                                                               | mean (SD)                                   | 8.75 (3.58) | 9.29 (5.38) | 10 (5.02)  |
|                                                                               | median (min, max)                           | 10 (4, 15)  | 10 (4, 20)  | 10 (4, 20) |
| How many cigarettes do you smoke per day? (categorical variable-smokers only) | 10 or less                                  | 14 (64%)    | 15 (63%)    | 20 (61%)   |
|                                                                               | 11-20                                       | 8 (36%)     | 9 (38%)     | 13 (39%)   |
|                                                                               | Missing                                     | 42          | 52          | 53         |
| How soon do you have your first smoke?                                        | Don't smoke at all                          | 1 (5.0%)    |             |            |
|                                                                               | Within 5 minutes                            | 3 (15%)     | 4 (18%)     | 4 (13%)    |
|                                                                               | 6-30 minutes                                | 9 (45%)     | 9 (41%)     | 14 (45%)   |
|                                                                               | 31-60 minutes                               | 4 (20%)     | 4 (18%)     | 6 (19%)    |
|                                                                               | Over 60 minutes                             | 3 (15%)     | 5 (23%)     | 7 (23%)    |
|                                                                               | Missing                                     | 44          | 54          | 55         |
| Heaviness of Smoking Index                                                    | n                                           | 20          | 22          | 31         |
|                                                                               | mean (SD)                                   | 5.15 (1.31) | 4.95 (1.4)  | 4.9 (1.33) |
|                                                                               | median (min, max)                           | 5 (3, 7)    | 5 (3, 7)    | 5 (3, 7)   |
| Have you ever tried to quit smoking? (Yes/No. Smokers only)                   | No, I haven't tried to quit                 | 3 (14%)     | 2 (8.3%)    | 2 (6.1%)   |
|                                                                               | Yes, I've tried to quit                     | 19 (86%)    | 22 (92%)    | 31 (94%)   |
|                                                                               | Missing                                     | 42          | 52          | 53         |

**Supplementary Table 4: Characteristics of participants that talk to friends**

| Question                                                              | Option                                   | To Quit Smoking<br>(n=83) | Your Health<br>(n=92) | For a Baby<br>(n=93) |
|-----------------------------------------------------------------------|------------------------------------------|---------------------------|-----------------------|----------------------|
| What is your age?                                                     | n                                        | 82                        | 90                    | 92                   |
|                                                                       | mean (SD)                                | 37.94 (14.19)             | 38.8 (14.85)          | 39.39 (14.45)        |
|                                                                       | median (min, max)                        | 36.5 (0, 68)              | 36.5 (0, 79)          | 37 (0, 79)           |
| Dichotomised Age                                                      | 16-49 years                              | 59 (73%)                  | 64 (72%)              | 65 (71%)             |
|                                                                       | 50+ years                                | 22 (27%)                  | 25 (28%)              | 26 (29%)             |
|                                                                       | Missing                                  | 2                         | 3                     | 2                    |
| Do you identify as Aboriginal or Torres Strait Islander?              | Yes, Aboriginal                          | 80 (98%)                  | 86 (95%)              | 87 (95%)             |
|                                                                       | Yes, Aboriginal & Torres Strait Islander | 2 (2.4%)                  | 5 (5.5%)              | 5 (5.4%)             |
|                                                                       | Missing                                  | 1                         | 1                     | 1                    |
| Are you currently pregnant?                                           | No                                       | 78 (95%)                  | 84 (93%)              | 86 (93%)             |
|                                                                       | Yes                                      | 4 (4.9%)                  | 6 (6.7%)              | 6 (6.5%)             |
|                                                                       | Missing                                  | 1                         | 2                     | 1                    |
| How far into your pregnancy are you?(if pregnant)                     | up to 12 weeks                           |                           |                       |                      |
|                                                                       | 13 to 24 weeks                           | 1 (25%)                   | 1 (17%)               | 1 (17%)              |
|                                                                       | 25 to 40 weeks                           | 3 (75%)                   | 5 (83%)               | 5 (83%)              |
|                                                                       | Missing                                  | 79                        | 86                    | 87                   |
| Have you given birth before?(if not pregnant)                         | No                                       | 13 (24%)                  | 13 (22%)              | 8 (14%)              |
|                                                                       | Yes                                      | 42 (76%)                  | 47 (78%)              | 51 (86%)             |
|                                                                       | Missing                                  | 28                        | 32                    | 34                   |
| If yes, how many babies and/or children are living in your household? | No Children                              | 33 (42%)                  | 33 (38%)              | 31 (34%)             |
|                                                                       | 1 child                                  | 8 (10%)                   | 6 (6.9%)              | 11 (12%)             |
|                                                                       | 2 children                               | 14 (18%)                  | 15 (17%)              | 16 (18%)             |
|                                                                       | 3 children                               | 11 (14%)                  | 14 (16%)              | 15 (16%)             |
|                                                                       | 4 or more children                       | 13 (16%)                  | 19 (22%)              | 18 (20%)             |
|                                                                       | Missing                                  | 4                         | 5                     | 2                    |
| Number of tobacco Smokers in household?                               | 0                                        | 33 (41%)                  | 40 (44%)              | 33 (35%)             |
|                                                                       | 1                                        | 26 (32%)                  | 30 (33%)              | 34 (37%)             |
|                                                                       | 2-3                                      | 20 (25%)                  | 18 (20%)              | 23 (25%)             |
|                                                                       | More than 3                              | 2 (2.5%)                  | 3 (3.3%)              | 3 (3.2%)             |
|                                                                       | Missing                                  | 2                         | 1                     | 0                    |
| How does your household manage places where smoking is allowed?       | Complete ban on smoking anywhere inside  | 11 (14%)                  | 20 (23%)              | 17 (19%)             |

|                                                                               | Smoking only on verandah/immediate area     | 60 (77%)   | 62 (70%)    | 62 (70%)    |
|-------------------------------------------------------------------------------|---------------------------------------------|------------|-------------|-------------|
|                                                                               | Smoking allowed in some rooms & on veranda  | 5 (6.4%)   | 4 (4.5%)    | 7 (7.9%)    |
|                                                                               | People can smoke anywhere in or outside     | 2 (2.6%)   | 2 (2.3%)    | 3 (3.4%)    |
|                                                                               | Missing                                     | 5          | 4           | 4           |
| Do you currently smoke tobacco?                                               | Yes                                         | 34 (42%)   | 30 (33%)    | 39 (42%)    |
|                                                                               | No, I used to smoke tobacco but have quit   | 22 (27%)   | 30 (33%)    | 31 (33%)    |
|                                                                               | No, I have never smoked tobacco of any time | 25 (31%)   | 30 (33%)    | 23 (25%)    |
|                                                                               | Missing                                     | 2          | 2           | 0           |
| How often do you smoke tobacco?(smokers only)                                 | Daily                                       | 24 (73%)   | 19 (68%)    | 28 (76%)    |
|                                                                               | Non-Daily                                   | 9 (27%)    | 9 (32%)     | 9 (24%)     |
|                                                                               | Missing                                     | 50         | 64          | 56          |
| How many cigarettes do you smoke per day? (continuous variable-smokers only)  | n                                           | 12         | 11          | 10          |
|                                                                               | mean (SD)                                   | 9.5 (5.09) | 9.82 (5.21) | 10.5 (4.99) |
|                                                                               | median (min, max)                           | 10 (4, 20) | 10 (4, 20)  | 10 (4, 20)  |
| How many cigarettes do you smoke per day? (categorical variable-smokers only) | 10 or less                                  | 23 (68%)   | 18 (62%)    | 22 (58%)    |
|                                                                               | 11-20                                       | 11 (32%)   | 11 (38%)    | 16 (42%)    |
|                                                                               | Missing                                     | 49         | 63          | 55          |
| How soon do you have your first smoke?                                        | don't smoke at all                          | 1 (3.1%)   |             |             |
|                                                                               | Within 5 minutes                            | 5 (16%)    | 6 (22%)     | 7 (19%)     |
|                                                                               | 6-30 minutes                                | 14 (44%)   | 11 (41%)    | 16 (44%)    |
|                                                                               | 31-60 minutes                               | 6 (19%)    | 4 (15%)     | 6 (17%)     |
|                                                                               | Over 60 minutes                             | 6 (19%)    | 6 (22%)     | 7 (19%)     |
|                                                                               | Missing                                     | 51         | 65          | 57          |
| Heaviness of Smoking Index                                                    | n                                           | 32         | 27          | 36          |
|                                                                               | mean (SD)                                   | 5 (1.34)   | 5.04 (1.4)  | 5.08 (1.32) |
|                                                                               | median (min, max)                           | 5 (3, 7)   | 5 (3, 7)    | 5 (3, 7)    |
| Have you ever tried to quit smoking?(Yes/No. Smokers only)                    | No, I haven't tried to quit                 | 5 (15%)    | 5 (17%)     | 4 (11%)     |
|                                                                               | Yes, I've tried to quit                     | 29 (85%)   | 24 (83%)    | 34 (89%)    |
|                                                                               | Missing                                     | 49         | 63          | 55          |

**Supplementary Table 5: Characteristics of participants that use community groups**

| Question                                                              | Option                                   | To Quit Smoking<br>(n=46) | Your Health<br>(n=73) | For a Baby<br>(n=67) |
|-----------------------------------------------------------------------|------------------------------------------|---------------------------|-----------------------|----------------------|
| What is your age?                                                     | n                                        | 46                        | 71                    | 66                   |
|                                                                       | mean (SD)                                | 38.65 (14.01)             | 41.07 (14.39)         | 39.38 (14.63)        |
|                                                                       | median (min, max)                        | 36 (16, 68)               | 39 (0, 79)            | 37.5 (0, 79)         |
| Dichotomised Age                                                      | 16-49 years                              | 34 (74%)                  | 48 (69%)              | 47 (72%)             |
|                                                                       | 50+ years                                | 12 (26%)                  | 22 (31%)              | 18 (28%)             |
|                                                                       | Missing                                  | 0                         | 3                     | 2                    |
| Do you identify as Aboriginal or Torres Strait Islander?              | Yes, Aboriginal                          | 44 (98%)                  | 69 (96%)              | 61 (92%)             |
|                                                                       | Yes, Aboriginal & Torres Strait Islander | 1 (2.2%)                  | 3 (4.2%)              | 5 (7.6%)             |
|                                                                       | Missing                                  | 1                         | 1                     | 1                    |
| Are you currently pregnant?                                           | No                                       | 43 (93%)                  | 67 (93%)              | 61 (91%)             |
|                                                                       | Yes                                      | 3 (6.5%)                  | 5 (6.9%)              | 6 (9.0%)             |
|                                                                       | Missing                                  | 0                         | 1                     | 0                    |
| How far into your pregnancy are you?(if pregnant)                     | up to 12 weeks                           |                           |                       |                      |
|                                                                       | 13 to 24 weeks                           | 1 (33%)                   | 1 (20%)               | 1 (17%)              |
|                                                                       | 25 to 40 weeks                           | 2 (67%)                   | 4 (80%)               | 5 (83%)              |
|                                                                       | Missing                                  | 43                        | 68                    | 61                   |
| Have you given birth before?(if not pregnant)                         | No                                       | 6 (19%)                   | 6 (13%)               | 6 (15%)              |
|                                                                       | Yes                                      | 25 (81%)                  | 39 (87%)              | 35 (85%)             |
|                                                                       | Missing                                  | 15                        | 28                    | 26                   |
| If yes, how many babies and/or children are living in your household? | No Children                              | 15 (34%)                  | 25 (36%)              | 22 (33%)             |
|                                                                       | 1 child                                  | 3 (6.8%)                  | 4 (5.7%)              | 6 (9.1%)             |
|                                                                       | 2 children                               | 10 (23%)                  | 12 (17%)              | 12 (18%)             |
|                                                                       | 3 children                               | 8 (18%)                   | 13 (19%)              | 12 (18%)             |
|                                                                       | 4 or more children                       | 8 (18%)                   | 16 (23%)              | 14 (21%)             |
|                                                                       | Missing                                  | 2                         | 3                     | 1                    |
| Number of tobacco Smokers in household?                               | 0                                        | 21 (46%)                  | 34 (47%)              | 28 (42%)             |
|                                                                       | 1                                        | 13 (28%)                  | 21 (29%)              | 21 (31%)             |
|                                                                       | 2-3                                      | 12 (26%)                  | 15 (21%)              | 16 (24%)             |
|                                                                       | More than 3                              |                           | 3 (4.1%)              | 2 (3.0%)             |
|                                                                       | Missing                                  | 0                         | 0                     | 0                    |
| How does your household manage places where smoking is allowed?       | Complete ban on smoking anywhere inside  | 9 (20%)                   | 16 (23%)              | 14 (22%)             |

|                                                                               |                                             |             |             |              |
|-------------------------------------------------------------------------------|---------------------------------------------|-------------|-------------|--------------|
|                                                                               | Smoking only on verandah/immediate area     | 32 (73%)    | 48 (69%)    | 46 (71%)     |
|                                                                               | Smoking allowed in some rooms & on veranda  | 2 (4.5%)    | 4 (5.7%)    | 4 (6.2%)     |
|                                                                               | People can smoke anywhere in or outside     | 1 (2.3%)    | 2 (2.9%)    | 1 (1.5%)     |
|                                                                               | Missing                                     | 2           | 3           | 2            |
| Do you currently smoke tobacco?                                               | Yes                                         | 15 (33%)    | 23 (32%)    | 20 (30%)     |
|                                                                               | No, I used to smoke tobacco but have quit   | 15 (33%)    | 26 (36%)    | 25 (38%)     |
|                                                                               | No, I have never smoked tobacco of any time | 15 (33%)    | 23 (32%)    | 21 (32%)     |
|                                                                               | Missing                                     | 1           | 1           | 1            |
| How often do you smoke tobacco?(smokers only)                                 | Daily                                       | 9 (64%)     | 16 (73%)    | 14 (70%)     |
|                                                                               | Non-Daily                                   | 5 (36%)     | 6 (27%)     | 6 (30%)      |
|                                                                               | Missing                                     | 32          | 51          | 47           |
| How many cigarettes do you smoke per day? (continuous variable-smokers only)  | n                                           | 5           | 4           | 6            |
|                                                                               | mean (SD)                                   | 9.8 (3.9)   | 11.25 (2.5) | 10.17 (5.31) |
|                                                                               | median (min, max)                           | 10 (4, 15)  | 10 (10, 15) | 10 (5, 20)   |
| How many cigarettes do you smoke per day? (categorical variable-smokers only) | 10 or less                                  | 10 (67%)    | 13 (57%)    | 12 (60%)     |
|                                                                               | 11-20                                       | 5 (33%)     | 10 (43%)    | 8 (40%)      |
|                                                                               | Missing                                     | 31          | 50          | 47           |
| How soon do you have your first smoke?                                        | don't smoke at all                          | 1 (7.7%)    |             |              |
|                                                                               | Within 5 minutes                            | 3 (23%)     | 4 (19%)     | 3 (16%)      |
|                                                                               | 6-30 minutes                                | 4 (31%)     | 10 (48%)    | 10 (53%)     |
|                                                                               | 31-60 minutes                               | 5 (38%)     | 5 (24%)     | 3 (16%)      |
|                                                                               | Over 60 minutes                             |             | 2 (9.5%)    | 3 (16%)      |
|                                                                               | Missing                                     | 33          | 52          | 48           |
| Heaviness of Smoking Index                                                    | n                                           | 13          | 21          | 19           |
|                                                                               | mean (SD)                                   | 5.38 (1.19) | 5.24 (1.14) | 5.11 (1.29)  |
|                                                                               | median (min, max)                           | 5 (4, 7)    | 5 (3, 7)    | 5 (3, 7)     |
| Have you ever tried to quit smoking?(Yes/No. Smokers only)                    | No, I haven't tried to quit                 | 3 (20%)     | 4 (17%)     | 4 (20%)      |
|                                                                               | Yes, I've tried to quit                     | 12 (80%)    | 19 (83%)    | 16 (80%)     |
|                                                                               | Missing                                     | 31          | 50          | 47           |



**Supplementary Table 6: Characteristics of participants that use Facebook**

| Question                                                              | Option                                   | To Quit Smoking<br>(n=30) | Your Health<br>(n=59) | For a Baby<br>(n=46) |
|-----------------------------------------------------------------------|------------------------------------------|---------------------------|-----------------------|----------------------|
| What is your age?                                                     | n                                        | 30                        | 58                    | 45                   |
|                                                                       | mean (SD)                                | 38 (13.44)                | 33.84 (11.75)         | 36.2 (13.41)         |
|                                                                       | median (min, max)                        | 36.5 (17, 60)             | 31.5 (0, 61)          | 34 (0, 64)           |
| Dichotomised Age                                                      | 16-49 years                              | 21 (70%)                  | 49 (86%)              | 35 (80%)             |
|                                                                       | 50+ years                                | 9 (30%)                   | 8 (14%)               | 9 (20%)              |
|                                                                       | Missing                                  | 0                         | 2                     | 2                    |
| Do you identify as Aboriginal or Torres Strait Islander?              | Yes, Aboriginal                          | 27 (90%)                  | 54 (92%)              | 43 (93%)             |
|                                                                       | Yes, Aboriginal & Torres Strait Islander | 3 (10%)                   | 5 (8.5%)              | 3 (6.5%)             |
|                                                                       | Missing                                  | 0                         | 0                     | 0                    |
| Are you currently pregnant?                                           | No                                       | 28 (93%)                  | 54 (92%)              | 42 (93%)             |
|                                                                       | Yes                                      | 2 (6.7%)                  | 5 (8.5%)              | 3 (6.7%)             |
|                                                                       | Missing                                  | 0                         | 0                     | 1                    |
| How far into your pregnancy are you?(if pregnant)                     | up to 12 weeks                           |                           |                       |                      |
|                                                                       | 13 to 24 weeks                           |                           | 1 (20%)               |                      |
|                                                                       | 25 to 40 weeks                           | 2 (100%)                  | 4 (80%)               | 3 (100%)             |
|                                                                       | Missing                                  | 28                        | 54                    | 43                   |
| Have you given birth before?(if not pregnant)                         | No                                       | 4 (19%)                   | 11 (27%)              | 5 (18%)              |
|                                                                       | Yes                                      | 17 (81%)                  | 30 (73%)              | 23 (82%)             |
|                                                                       | Missing                                  | 9                         | 18                    | 18                   |
| If yes, how many babies and/or children are living in your household? | No Children                              | 10 (33%)                  | 17 (29%)              | 11 (25%)             |
|                                                                       | 1 child                                  | 3 (10%)                   | 6 (10%)               | 6 (14%)              |
|                                                                       | 2 children                               | 8 (27%)                   | 9 (15%)               | 9 (20%)              |
|                                                                       | 3 children                               | 3 (10%)                   | 14 (24%)              | 8 (18%)              |
|                                                                       | 4 or more children                       | 6 (20%)                   | 13 (22%)              | 10 (23%)             |
|                                                                       | Missing                                  | 0                         | 0                     | 2                    |
| Number of tobacco Smokers in household?                               | 0                                        | 15 (50%)                  | 26 (44%)              | 21 (46%)             |
|                                                                       | 1                                        | 10 (33%)                  | 18 (31%)              | 11 (24%)             |
|                                                                       | 2-3                                      | 4 (13%)                   | 14 (24%)              | 13 (28%)             |
|                                                                       | More than 3                              | 1 (3.3%)                  | 1 (1.7%)              | 1 (2.2%)             |
|                                                                       | Missing                                  | 0                         | 0                     | 0                    |
| How does your household manage places where smoking is allowed?       | Complete ban on smoking anywhere inside  | 8 (27%)                   | 12 (21%)              | 13 (30%)             |

|                                                                               |                                             |             |              |             |
|-------------------------------------------------------------------------------|---------------------------------------------|-------------|--------------|-------------|
|                                                                               | Smoking only on verandah/immediate area     | 18 (60%)    | 42 (74%)     | 29 (66%)    |
|                                                                               | Smoking allowed in some rooms & on veranda  | 2 (6.7%)    | 2 (3.5%)     | 1 (2.3%)    |
|                                                                               | People can smoke anywhere in or outside     | 2 (6.7%)    | 1 (1.8%)     | 1 (2.3%)    |
|                                                                               | Missing                                     | 0           | 2            | 2           |
| Do you currently smoke tobacco?                                               | Yes                                         | 11 (37%)    | 23 (39%)     | 16 (35%)    |
|                                                                               | No, I used to smoke tobacco but have quit   | 8 (27%)     | 14 (24%)     | 16 (35%)    |
|                                                                               | No, I have never smoked tobacco of any time | 11 (37%)    | 22 (37%)     | 14 (30%)    |
|                                                                               | Missing                                     | 0           | 0            | 0           |
| How often do you smoke tobacco?(smokers only)                                 | Daily                                       | 8 (73%)     | 13 (62%)     | 8 (53%)     |
|                                                                               | Non-Daily                                   | 3 (27%)     | 8 (38%)      | 7 (47%)     |
|                                                                               | Missing                                     | 19          | 38           | 31          |
| How many cigarettes do you smoke per day? (continuous variable-smokers only)  | n                                           | 4           | 7            | 5           |
|                                                                               | mean (SD)                                   | 10 (0)      | 10.43 (5.71) | 10 (6.16)   |
|                                                                               | median (min, max)                           | 10 (10, 10) | 10 (4, 20)   | 10 (4, 20)  |
| How many cigarettes do you smoke per day? (categorical variable-smokers only) | 10 or less                                  | 8 (73%)     | 14 (64%)     | 11 (69%)    |
|                                                                               | 11-20                                       | 3 (27%)     | 8 (36%)      | 5 (31%)     |
|                                                                               | Missing                                     | 19          | 37           | 30          |
| How soon do you have your first smoke?                                        | don't smoke at all                          |             |              |             |
|                                                                               | Within 5 minutes                            | 1 (10%)     | 7 (35%)      | 4 (29%)     |
|                                                                               | 6-30 minutes                                | 4 (40%)     | 5 (25%)      | 2 (14%)     |
|                                                                               | 31-60 minutes                               | 3 (30%)     | 4 (20%)      | 2 (14%)     |
|                                                                               | Over 60 minutes                             | 2 (20%)     | 4 (20%)      | 6 (43%)     |
|                                                                               | Missing                                     | 20          | 39           | 32          |
| Heaviness of Smoking Index                                                    | n                                           | 10          | 20           | 14          |
|                                                                               | mean (SD)                                   | 4.7 (1.06)  | 5.15 (1.46)  | 4.64 (1.65) |
|                                                                               | median (min, max)                           | 4.5 (3, 6)  | 5 (3, 7)     | 4 (3, 7)    |
| Have you ever tried to quit smoking?(Yes/No. Smokers only)                    | No, I haven't tried to quit                 |             | 2 (9.1%)     | 1 (6.3%)    |
|                                                                               | Yes, I've tried to quit                     | 11 (100%)   | 20 (91%)     | 15 (94%)    |
|                                                                               | Missing                                     | 19          | 37           | 30          |

**Supplementary Table 7: Characteristics of participants that use the Internet**

| Question                                                              | Option                                   | To Quit Smoking<br>(n=49) | Your Health<br>(n=67) | For a Baby<br>(n=57) |
|-----------------------------------------------------------------------|------------------------------------------|---------------------------|-----------------------|----------------------|
| What is your age?                                                     | n                                        | 49                        | 66                    | 56                   |
|                                                                       | mean (SD)                                | 36.63 (12.72)             | 35.58 (11.59)         | 36.16 (11.9)         |
|                                                                       | median (min, max)                        | 38 (0, 60)                | 34 (0, 59)            | 34 (16, 64)          |
| Dichotomised Age                                                      | 16-49 years                              | 38 (79%)                  | 55 (85%)              | 46 (82%)             |
|                                                                       | 50+ years                                | 10 (21%)                  | 10 (15%)              | 10 (18%)             |
|                                                                       | Missing                                  | 1                         | 2                     | 1                    |
| Do you identify as Aboriginal or Torres Strait Islander?              | Yes, Aboriginal                          | 46 (94%)                  | 64 (96%)              | 53 (95%)             |
|                                                                       | Yes, Aboriginal & Torres Strait Islander | 3 (6.1%)                  | 3 (4.5%)              | 3 (5.4%)             |
|                                                                       | Missing                                  | 0                         | 0                     | 1                    |
| Are you currently pregnant?                                           | No                                       | 46 (96%)                  | 61 (92%)              | 51 (91%)             |
|                                                                       | Yes                                      | 2 (4.2%)                  | 5 (7.6%)              | 5 (8.9%)             |
|                                                                       | Missing                                  | 1                         | 1                     | 1                    |
| How far into your pregnancy are you?(if pregnant)                     | up to 12 weeks                           |                           |                       |                      |
|                                                                       | 13 to 24 weeks                           | 1 (50%)                   | 1 (20%)               | 1 (20%)              |
|                                                                       | 25 to 40 weeks                           | 1 (50%)                   | 4 (80%)               | 4 (80%)              |
|                                                                       | Missing                                  | 47                        | 62                    | 52                   |
| Have you given birth before?(if not pregnant)                         | No                                       | 5 (14%)                   | 10 (22%)              | 8 (21%)              |
|                                                                       | Yes                                      | 30 (86%)                  | 35 (78%)              | 30 (79%)             |
|                                                                       | Missing                                  | 14                        | 22                    | 19                   |
| If yes, how many babies and/or children are living in your household? | No Children                              | 14 (30%)                  | 19 (30%)              | 13 (23%)             |
|                                                                       | 1 child                                  | 4 (8.5%)                  | 6 (9.4%)              | 9 (16%)              |
|                                                                       | 2 children                               | 10 (21%)                  | 10 (16%)              | 9 (16%)              |
|                                                                       | 3 children                               | 11 (23%)                  | 16 (25%)              | 12 (21%)             |
|                                                                       | 4 or more children                       | 8 (17%)                   | 13 (20%)              | 13 (23%)             |
|                                                                       | Missing                                  | 2                         | 3                     | 1                    |
| Number of tobacco Smokers in household?                               | 0                                        | 20 (41%)                  | 29 (43%)              | 23 (40%)             |
|                                                                       | 1                                        | 18 (37%)                  | 20 (30%)              | 18 (32%)             |
|                                                                       | 2-3                                      | 10 (20%)                  | 17 (25%)              | 14 (25%)             |
|                                                                       | More than 3                              | 1 (2.0%)                  | 1 (1.5%)              | 2 (3.5%)             |
|                                                                       | Missing                                  | 0                         | 0                     | 0                    |
| How does your household manage places where smoking is allowed?       | Complete ban on smoking anywhere inside  | 9 (20%)                   | 12 (19%)              | 11 (21%)             |

|                                                                               |                                             |             |             |             |
|-------------------------------------------------------------------------------|---------------------------------------------|-------------|-------------|-------------|
|                                                                               | Smoking only on verandah/immediate area     | 34 (74%)    | 46 (73%)    | 39 (74%)    |
|                                                                               | Smoking allowed in some rooms & on veranda  | 2 (4.3%)    | 3 (4.8%)    | 2 (3.8%)    |
|                                                                               | People can smoke anywhere in or outside     | 1 (2.2%)    | 2 (3.2%)    | 1 (1.9%)    |
|                                                                               | Missing                                     | 3           | 4           | 4           |
| Do you currently smoke tobacco?                                               | Yes                                         | 20 (42%)    | 26 (39%)    | 24 (42%)    |
|                                                                               | No, I used to smoke tobacco but have quit   | 14 (29%)    | 19 (28%)    | 16 (28%)    |
|                                                                               | No, I have never smoked tobacco of any time | 14 (29%)    | 22 (33%)    | 17 (30%)    |
|                                                                               | Missing                                     | 1           | 0           | 0           |
| How often do you smoke tobacco?(smokers only)                                 | Daily                                       | 12 (63%)    | 17 (71%)    | 16 (70%)    |
|                                                                               | Non-Daily                                   | 7 (37%)     | 7 (29%)     | 7 (30%)     |
|                                                                               | Missing                                     | 30          | 43          | 34          |
| How many cigarettes do you smoke per day? (continuous variable-smokers only)  | n                                           | 8           | 8           | 6           |
|                                                                               | mean (SD)                                   | 7.38 (2.88) | 8.5 (3.85)  | 8.33 (2.66) |
|                                                                               | median (min, max)                           | 8 (4, 10)   | 10 (4, 15)  | 10 (4, 10)  |
| How many cigarettes do you smoke per day? (categorical variable-smokers only) | 10 or less                                  | 16 (80%)    | 17 (68%)    | 16 (67%)    |
|                                                                               | 11-20                                       | 4 (20%)     | 8 (32%)     | 8 (33%)     |
|                                                                               | Missing                                     | 29          | 42          | 33          |
| How soon do you have your first smoke?                                        | don't smoke at all                          |             |             |             |
|                                                                               | Within 5 minutes                            | 3 (17%)     | 7 (30%)     | 3 (14%)     |
|                                                                               | 6-30 minutes                                | 7 (39%)     | 8 (35%)     | 8 (36%)     |
|                                                                               | 31-60 minutes                               | 3 (17%)     | 4 (17%)     | 5 (23%)     |
|                                                                               | Over 60 minutes                             | 5 (28%)     | 4 (17%)     | 6 (27%)     |
|                                                                               | Missing                                     | 31          | 44          | 35          |
| Heaviness of Smoking Index                                                    | n                                           | 18          | 23          | 22          |
|                                                                               | mean (SD)                                   | 4.67 (1.33) | 5.13 (1.42) | 4.73 (1.35) |
|                                                                               | median (min, max)                           | 5 (3, 7)    | 5 (3, 7)    | 4.5 (3, 7)  |
| Have you ever tried to quit smoking?(Yes/No. Smokers only)                    | No, I haven't tried to quit                 | 2 (10%)     | 3 (12%)     | 1 (4.2%)    |
|                                                                               | Yes, I've tried to quit                     | 18 (90%)    | 22 (88%)    | 23 (96%)    |
|                                                                               | Missing                                     | 29          | 42          | 33          |

**Supplementary Table 8: *Characteristics of participants that use an App***

| <b>Question</b>                                                       | <b>Option</b>                            | <b>To Quit Smoking<br/>(n=35)</b> | <b>Your Health<br/>(n=42)</b> | <b>For a Baby<br/>(n=37)</b> |
|-----------------------------------------------------------------------|------------------------------------------|-----------------------------------|-------------------------------|------------------------------|
| What is your age?                                                     | n                                        | 35                                | 41                            | 36                           |
|                                                                       | mean (SD)                                | 37.6 (12.5)                       | 36.63 (10.51)                 | 37.47 (11.96)                |
|                                                                       | median (min, max)                        | 36 (16, 59)                       | 34 (21, 58)                   | 35 (17, 64)                  |
| Dichotomised Age                                                      | 16-49 years                              | 27 (77%)                          | 34 (83%)                      | 29 (81%)                     |
|                                                                       | 50+ years                                | 8 (23%)                           | 7 (17%)                       | 7 (19%)                      |
|                                                                       | Missing                                  | 0                                 | 1                             | 1                            |
| Do you identify as Aboriginal or Torres Strait Islander?              | Yes, Aboriginal                          | 33 (94%)                          | 38 (90%)                      | 35 (95%)                     |
|                                                                       | Yes, Aboriginal & Torres Strait Islander | 2 (5.7%)                          | 4 (9.5%)                      | 2 (5.4%)                     |
|                                                                       | Missing                                  | 0                                 | 0                             | 0                            |
| Are you currently pregnant?                                           | No                                       | 34 (100%)                         | 38 (90%)                      | 33 (92%)                     |
|                                                                       | Yes                                      |                                   | 4 (9.5%)                      | 3 (8.3%)                     |
|                                                                       | Missing                                  | 1                                 | 0                             | 1                            |
| How far into your pregnancy are you?(if pregnant)                     | up to 12 weeks                           |                                   |                               |                              |
|                                                                       | 13 to 24 weeks                           |                                   |                               | 1 (33%)                      |
|                                                                       | 25 to 40 weeks                           |                                   | 4 (100%)                      | 2 (67%)                      |
|                                                                       | Missing                                  | 35                                | 38                            | 34                           |
| Have you given birth before?(if not pregnant)                         | No                                       | 6 (20%)                           | 3 (11%)                       | 2 (9.5%)                     |
|                                                                       | Yes                                      | 24 (80%)                          | 25 (89%)                      | 19 (90%)                     |
|                                                                       | Missing                                  | 5                                 | 14                            | 16                           |
| If yes, how many babies and/or children are living in your household? | No Children                              | 10 (30%)                          | 11 (26%)                      | 7 (19%)                      |
|                                                                       | 1 child                                  | 2 (6.1%)                          | 4 (9.5%)                      | 5 (14%)                      |
|                                                                       | 2 children                               | 9 (27%)                           | 8 (19%)                       | 7 (19%)                      |
|                                                                       | 3 children                               | 9 (27%)                           | 10 (24%)                      | 10 (28%)                     |
|                                                                       | 4 or more children                       | 3 (9.1%)                          | 9 (21%)                       | 7 (19%)                      |
|                                                                       | Missing                                  | 2                                 | 0                             | 1                            |
| Number of tobacco Smokers in household?                               | 0                                        | 17 (49%)                          | 20 (48%)                      | 16 (43%)                     |
|                                                                       | 1                                        | 12 (34%)                          | 10 (24%)                      | 10 (27%)                     |
|                                                                       | 2-3                                      | 5 (14%)                           | 11 (26%)                      | 10 (27%)                     |
|                                                                       | More than 3                              | 1 (2.9%)                          | 1 (2.4%)                      | 1 (2.7%)                     |
|                                                                       | Missing                                  | 0                                 | 0                             | 0                            |
| How does your household manage places where smoking is allowed?       | Complete ban on smoking anywhere inside  | 6 (18%)                           | 10 (24%)                      | 9 (25%)                      |

|                                                                               |                                             |             |             |             |
|-------------------------------------------------------------------------------|---------------------------------------------|-------------|-------------|-------------|
|                                                                               | Smoking only on verandah/immediate area     | 24 (71%)    | 29 (69%)    | 23 (64%)    |
|                                                                               | Smoking allowed in some rooms & on veranda  | 3 (8.8%)    | 2 (4.8%)    | 3 (8.3%)    |
|                                                                               | People can smoke anywhere in or outside     | 1 (2.9%)    | 1 (2.4%)    | 1 (2.8%)    |
|                                                                               | Missing                                     | 1           | 0           | 1           |
| Do you currently smoke tobacco?                                               | Yes                                         | 14 (40%)    | 18 (43%)    | 15 (41%)    |
|                                                                               | No, I used to smoke tobacco but have quit   | 8 (23%)     | 7 (17%)     | 10 (27%)    |
|                                                                               | No, I have never smoked tobacco of any time | 13 (37%)    | 17 (40%)    | 12 (32%)    |
|                                                                               | Missing                                     | 0           | 0           | 0           |
| How often do you smoke tobacco?(smokers only)                                 | Daily                                       | 11 (79%)    | 13 (72%)    | 11 (73%)    |
|                                                                               | Non-Daily                                   | 3 (21%)     | 5 (28%)     | 4 (27%)     |
|                                                                               | Missing                                     | 21          | 24          | 22          |
| How many cigarettes do you smoke per day? (continuous variable-smokers only)  | n                                           | 6           | 6           | 4           |
|                                                                               | mean (SD)                                   | 9.83 (3.49) | 9.83 (3.49) | 9 (2)       |
|                                                                               | median (min, max)                           | 10 (4, 15)  | 10 (4, 15)  | 10 (6, 10)  |
| How many cigarettes do you smoke per day? (categorical variable-smokers only) | 10 or less                                  | 8 (57%)     | 11 (61%)    | 9 (60%)     |
|                                                                               | 11-20                                       | 6 (43%)     | 7 (39%)     | 6 (40%)     |
|                                                                               | Missing                                     | 21          | 24          | 22          |
| How soon do you have your first smoke?                                        | don't smoke at all                          |             |             |             |
|                                                                               | Within 5 minutes                            | 3 (23%)     | 6 (35%)     | 3 (21%)     |
|                                                                               | 6-30 minutes                                | 6 (46%)     | 5 (29%)     | 4 (29%)     |
|                                                                               | 31-60 minutes                               | 2 (15%)     | 4 (24%)     | 3 (21%)     |
|                                                                               | Over 60 minutes                             | 2 (15%)     | 2 (12%)     | 4 (29%)     |
|                                                                               | Missing                                     | 22          | 25          | 23          |
| Heaviness of Smoking Index                                                    | n                                           | 13          | 17          | 14          |
|                                                                               | mean (SD)                                   | 5.23 (1.36) | 5.29 (1.31) | 4.86 (1.46) |
|                                                                               | median (min, max)                           | 6 (3, 7)    | 5 (3, 7)    | 4.5 (3, 7)  |
| Have you ever tried to quit smoking?(Yes/No. Smokers only)                    | No, I haven't tried to quit                 | 1 (7.1%)    | 3 (17%)     | 2 (13%)     |
|                                                                               | Yes, I've tried to quit                     | 13 (93%)    | 15 (83%)    | 13 (87%)    |
|                                                                               | Missing                                     | 21          | 24          | 22          |

**Supplementary Table 9: Characteristics of participants that use other supports**

| Question                                                              | Option                                   | To Quit Smoking<br>(n=10) | Your Health<br>(n=12) | For a Baby<br>(n=15) |
|-----------------------------------------------------------------------|------------------------------------------|---------------------------|-----------------------|----------------------|
| What is your age?                                                     | n                                        | 10                        | 12                    | 15                   |
|                                                                       | mean (SD)                                | 41.8 (14.51)              | 35.83 (9.8)           | 35.47 (12.62)        |
|                                                                       | median (min, max)                        | 45.5 (21, 61)             | 35 (22, 52)           | 34 (17, 64)          |
| Dichotomised Age                                                      | 16-49 years                              | 6 (60%)                   | 10 (83%)              | 13 (87%)             |
|                                                                       | 50+ years                                | 4 (40%)                   | 2 (17%)               | 2 (13%)              |
|                                                                       | Missing                                  | 0                         | 0                     | 0                    |
| Do you identify as Aboriginal or Torres Strait Islander?              | Yes, Aboriginal                          | 10 (100%)                 | 12 (100%)             | 14 (100%)            |
|                                                                       | Yes, Aboriginal & Torres Strait Islander |                           |                       |                      |
|                                                                       | Missing                                  | 0                         | 0                     | 1                    |
| Are you currently pregnant?                                           | No                                       | 10 (100%)                 | 11 (92%)              | 14 (93%)             |
|                                                                       | Yes                                      |                           | 1 (8.3%)              | 1 (6.7%)             |
|                                                                       | Missing                                  | 0                         | 0                     | 0                    |
| How far into your pregnancy are you?(if pregnant)                     | up to 12 weeks                           |                           |                       |                      |
|                                                                       | 13 to 24 weeks                           |                           |                       |                      |
|                                                                       | 25 to 40 weeks                           |                           | 1 (100%)              | 1 (100%)             |
|                                                                       | Missing                                  | 10                        | 11                    | 14                   |
| Have you given birth before?(if not pregnant)                         | No                                       | 4 (44%)                   | 2 (25%)               | 2 (25%)              |
|                                                                       | Yes                                      | 5 (56%)                   | 6 (75%)               | 6 (75%)              |
|                                                                       | Missing                                  | 1                         | 4                     | 7                    |
| If yes, how many babies and/or children are living in your household? | No Children                              | 4 (40%)                   |                       | 3 (20%)              |
|                                                                       | 1 child                                  |                           | 2 (17%)               | 3 (20%)              |
|                                                                       | 2 children                               | 1 (10%)                   | 3 (25%)               | 1 (6.7%)             |
|                                                                       | 3 children                               | 2 (20%)                   | 2 (17%)               | 3 (20%)              |
|                                                                       | 4 or more children                       | 3 (30%)                   | 5 (42%)               | 5 (33%)              |
|                                                                       | Missing                                  | 0                         | 0                     | 0                    |
| Number of tobacco Smokers in household?                               | 0                                        |                           | 7 (58%)               | 8 (53%)              |
|                                                                       | 1                                        | 6 (60%)                   | 3 (25%)               | 3 (20%)              |
|                                                                       | 2-3                                      | 2 (20%)                   | 2 (17%)               | 4 (27%)              |
|                                                                       | More than 3                              | 2 (20%)                   |                       |                      |
|                                                                       | Missing                                  | 0                         | 0                     | 0                    |
| How does your household manage places where smoking is allowed?       | People can smoke anywhere in or outside  |                           |                       |                      |

|                                                                               |                                             |             |           |             |
|-------------------------------------------------------------------------------|---------------------------------------------|-------------|-----------|-------------|
|                                                                               | Complete ban on smoking anywhere inside     | 3 (30%)     | 4 (33%)   | 5 (33%)     |
|                                                                               | Smoking only on verandah/immediate area     | 7 (70%)     | 7 (58%)   | 10 (67%)    |
|                                                                               | Smoking allowed in some rooms & on veranda  |             | 1 (8.3%)  |             |
|                                                                               | Missing                                     | 0           | 0         | 0           |
| Do you currently smoke tobacco?                                               | Yes                                         | 3 (30%)     | 4 (33%)   | 5 (33%)     |
|                                                                               | No, I used to smoke tobacco but have quit   | 1 (10%)     | 3 (25%)   | 3 (20%)     |
|                                                                               | No, I have never smoked tobacco of any time | 6 (60%)     | 5 (42%)   | 7 (47%)     |
|                                                                               | Missing                                     | 0           | 0         | 0           |
| How often do you smoke tobacco?(smokers only)                                 | Daily                                       | 1 (33%)     | 2 (50%)   | 4 (80%)     |
|                                                                               | Non-Daily                                   | 2 (67%)     | 2 (50%)   | 1 (20%)     |
|                                                                               | Missing                                     | 7           | 8         | 10          |
| How many cigarettes do you smoke per day? (continuous variable-smokers only)  | n                                           | 2           | 2         | 1           |
|                                                                               | mean (SD)                                   | 10 (0)      | 8 (2.83)  | 10 (.)      |
|                                                                               | median (min, max)                           | 10 (10, 10) | 8 (6, 10) | 10 (10, 10) |
| How many cigarettes do you smoke per day? (categorical variable-smokers only) | 10 or less                                  | 3 (100%)    | 4 (100%)  | 4 (80%)     |
|                                                                               | 11-20                                       |             |           | 1 (20%)     |
|                                                                               | Missing                                     | 7           | 8         | 10          |
| How soon do you have your first smoke?                                        | don't smoke at all                          | 1 (50%)     |           |             |
|                                                                               | Over 60 minutes                             |             |           |             |
|                                                                               | Within 5 minutes                            |             | 1 (33%)   | 1 (25%)     |
|                                                                               | 6-30 minutes                                | 1 (50%)     | 1 (33%)   | 1 (25%)     |
|                                                                               | 31-60 minutes                               |             | 1 (33%)   | 2 (50%)     |
|                                                                               | Missing                                     | 8           | 9         | 11          |
| Heaviness of Smoking Index                                                    | n                                           | 2           | 3         | 4           |
|                                                                               | mean (SD)                                   | 5.5 (2.12)  | 4 (1)     | 5 (1.41)    |
|                                                                               | median (min, max)                           | 5.5 (4, 7)  | 4 (3, 5)  | 4.5 (4, 7)  |
| Have you ever tried to quit smoking?(Yes/No. Smokers only)                    | No, I haven't tried to quit                 |             | 1 (25%)   | 1 (20%)     |
|                                                                               | Yes, I've tried to quit                     | 3 (100%)    | 3 (75%)   | 4 (80%)     |
|                                                                               | Missing                                     | 7           | 8         | 10          |



**Supplementary Table 10: Characteristics of participants that use quit medications**

| Question                                                              | Option                                     | To Quit Smoking<br>(n=64) |
|-----------------------------------------------------------------------|--------------------------------------------|---------------------------|
| What is your age?                                                     | n                                          | 62                        |
|                                                                       | mean (SD)                                  | 37.95 (13.11)             |
|                                                                       | median (min, max)                          | 38 (0, 61)                |
| Dichotomised Age                                                      | 16-49 years                                | 46 (75%)                  |
|                                                                       | 50+ years                                  | 15 (25%)                  |
|                                                                       | Missing                                    | 3                         |
| Do you identify as Aboriginal or Torres Strait Islander?              | Yes, Aboriginal                            | 59 (94%)                  |
|                                                                       | Yes, Aboriginal & Torres Strait Islander   | 4 (6.3%)                  |
|                                                                       | Missing                                    | 1                         |
| Are you currently pregnant?                                           | No                                         | 58 (92%)                  |
|                                                                       | Yes                                        | 5 (7.9%)                  |
|                                                                       | Missing                                    | 1                         |
| How far into your pregnancy are you?(if pregnant)                     | up to 12 weeks                             |                           |
|                                                                       | 13 to 24 weeks                             | 1 (20%)                   |
|                                                                       | 25 to 40 weeks                             | 4 (80%)                   |
|                                                                       | Missing                                    | 59                        |
| Have you given birth before?(if not pregnant)                         | No                                         | 10 (20%)                  |
|                                                                       | Yes                                        | 39 (80%)                  |
|                                                                       | Missing                                    | 15                        |
| If yes, how many babies and/or children are living in your household? | No Children                                | 25 (40%)                  |
|                                                                       | 1 child                                    | 2 (3.2%)                  |
|                                                                       | 2 children                                 | 11 (18%)                  |
|                                                                       | 3 children                                 | 16 (26%)                  |
|                                                                       | 4 or more children                         | 8 (13%)                   |
|                                                                       | Missing                                    | 2                         |
| Number of tobacco Smokers in household?                               | 0                                          | 27 (43%)                  |
|                                                                       | 1                                          | 19 (30%)                  |
|                                                                       | 2-3                                        | 16 (25%)                  |
|                                                                       | More than 3                                | 1 (1.6%)                  |
|                                                                       | Missing                                    | 1                         |
| How does your household manage places where smoking is allowed?       | Complete ban on smoking anywhere inside    | 11 (18%)                  |
|                                                                       | Smoking only on verandah/immediate area    | 44 (71%)                  |
|                                                                       | Smoking allowed in some rooms & on veranda | 6 (9.7%)                  |
|                                                                       | People can smoke anywhere in or outside    | 1 (1.6%)                  |
|                                                                       | Missing                                    | 2                         |

|                                                                               |                                             |              |
|-------------------------------------------------------------------------------|---------------------------------------------|--------------|
| Do you currently smoke tobacco?                                               | Yes                                         | 28 (44%)     |
|                                                                               | No, I used to smoke tobacco but have quit   | 15 (24%)     |
|                                                                               | No, I have never smoked tobacco of any time | 20 (32%)     |
|                                                                               | Missing                                     | 1            |
| How often do you smoke tobacco?(smokers only)                                 | Daily                                       | 23 (82%)     |
|                                                                               | Non-Daily                                   | 5 (18%)      |
|                                                                               | Missing                                     | 36           |
| How many cigarettes do you smoke per day? (continuous variable-smokers only)  | n                                           | 12           |
|                                                                               | mean (SD)                                   | 10.25 (5.19) |
|                                                                               | median (min, max)                           | 10 (4, 20)   |
| How many cigarettes do you smoke per day? (categorical variable-smokers only) | 10 or less                                  | 16 (57%)     |
|                                                                               | 11-20                                       | 12 (43%)     |
|                                                                               | Missing                                     | 36           |
| How soon do you have your first smoke?                                        | don't smoke at all                          |              |
|                                                                               | Within 5 minutes                            | 7 (26%)      |
|                                                                               | 6-30 minutes                                | 12 (44%)     |
|                                                                               | 31-60 minutes                               | 6 (22%)      |
|                                                                               | Over 60 minutes                             | 2 (7.4%)     |
|                                                                               | Missing                                     | 37           |
| Heaviness of Smoking Index                                                    | n                                           | 27           |
|                                                                               | mean (SD)                                   | 5.33 (1.21)  |
|                                                                               | median (min, max)                           | 5 (3, 7)     |
| Have you ever tried to quit smoking?(Yes/ No. Smokers only)                   | No, I haven't tried to quit                 | 4 (14%)      |
|                                                                               | Yes, I've tried to quit                     | 24 (86%)     |
|                                                                               | Missing                                     | 36           |
